# Supplementary material for: Multi-omic brain and behavioral correlates of cell-free fetal DNA methylation in macaque maternal obesity models
Source: PubMed Central journal article supplement (PMC9492781; doi:10.1038/s41467-022-33162-7), 2022-09-21
Supplement: 41467_2022_33162_MOESM1_ESM.pdf [file 41467_2022_33162_MOESM1_ESM.pdf]

**Multi-omic brain and behavioral correlates of cell-free fetal DNA methylation in macaque maternal obesity models**

**Supplementary Table 1:** Group comparisons of **a)** background variables and **b)** body weights of dams during pregnancy (kg).

**A. Background variables.**

|                     | N | Dam BCS (score) | Sire BCS <sup>1</sup> (score) | Dam age (years) | Delivery type (vaginal/c-section) | Fostered (yes/no) |
|---------------------|---|-----------------|-------------------------------|-----------------|-----------------------------------|-------------------|
| Obese               | 7 | 3.6±.14         | 2.9±0.1                       | 10.46±.44       | 5/2                               | 5/2               |
| Control             | 6 | 2.2±.17****     | 2.8±0.3                       | 9.05±.64        | 4/2                               | 3/3               |
| Caloric restriction | 5 | 3.5±.00         | 3.5±0.4                       | 12.23±.93       | 5/0                               | 5/0               |
| Pravastatin         | 7 | 3.7±.15         | 2.8±0.2                       | 12.16±.56       | 6/1                               | 6/1               |

Mean±sem; BCS= Body Composition Score

\*\*\*\*p<.001 ANOVA with Dunnett's post hoc analysis of all groups compared to Obese group.

<sup>1</sup>mean of 5 values obtained during the study; one sire in the caloric restriction group had only one BCS.

**B. Body weights of dams during pregnancy (kg)**

|                     | N              | GD45      | GD90       | GD120       | GD150        |
|---------------------|----------------|-----------|------------|-------------|--------------|
| Obese               | 7              | 10.82±.44 | 10.94±.36  | 11.18±.40   | 11.51±.46    |
| Control             | 6 <sup>1</sup> | 7.65±.41* | 8.33±.38** | 8.49±.42*** | 8.89±.43**** |
| Caloric restriction | 5              | 9.69±0.83 | 10.00±.89  | 9.99±.88    | 10.14±.83    |
| Pravastatin         | 7              | 9.79±.29  | 9.80±.35   | 9.98±.41    | 10.32±.47    |

Mean±sem; GD=gestation day

\*p=.0006, \*\*p=.0041, \*\*\*p=.0032, \*\*\*\*p=.0057 ANOVA with Dunnett's post hoc analysis of all groups compared to Obese group.

<sup>1</sup>N=5, GD45, GD90

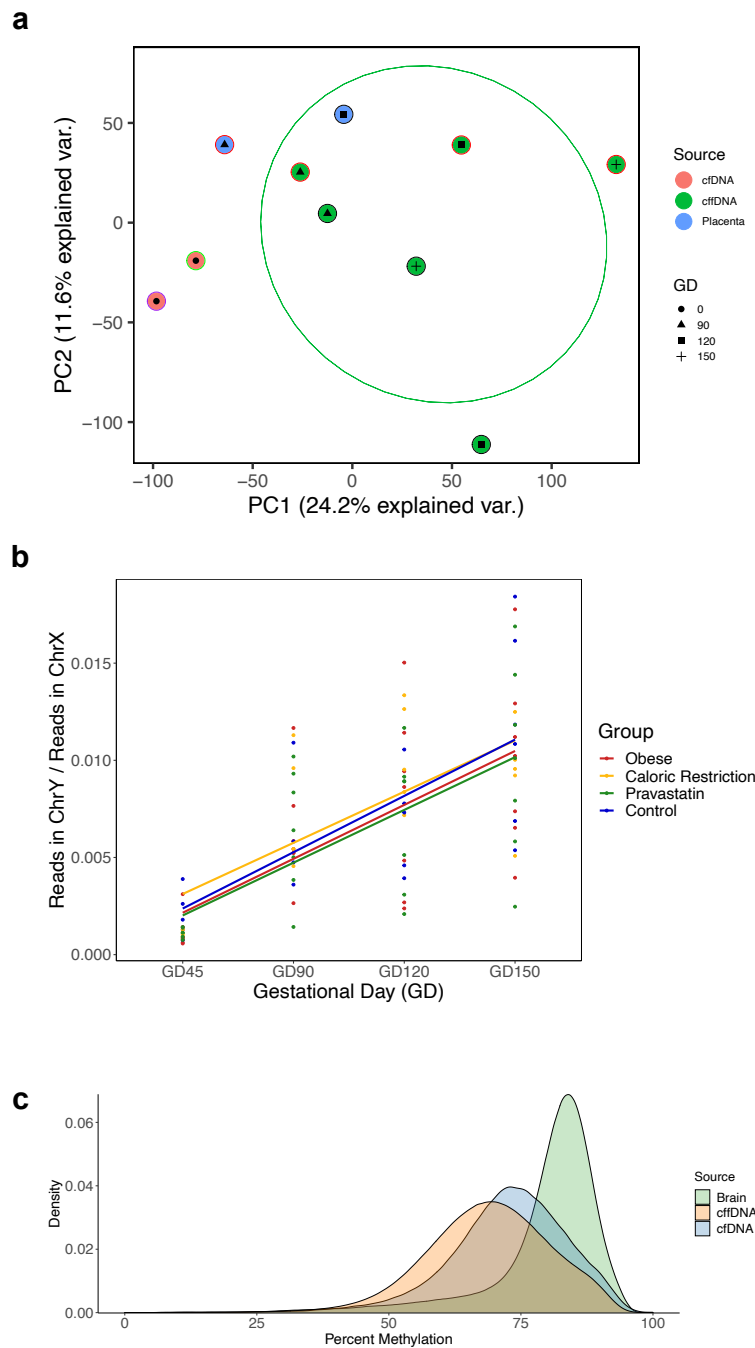

**Supplementary Fig. 1:** cffDNA technical confirmation experiments from the pilot and main experiments. **a)** Principal component analysis (PCA) of smoothed methylation levels from gene regulatory and gene body regions (+5 kb to -1 kb from the gene body) comparing cffDNA, cell-free DNA (cfDNA) from non-pregnant mothers, and placental biopsies from different pregnancy time points in a lower coverage pilot experiment. The outermost color around each dot represents the individual animal. **b)** Line plot of the ratio of Y chromosome reads over X chromosome reads for the cffDNA methylomes across all pregnancy timepoints for the different groups from the main experiment. **c)** Density plots of global DNA methylation levels (20 kb windows) in cffDNA, cfDNA, and brain from the main experiment.

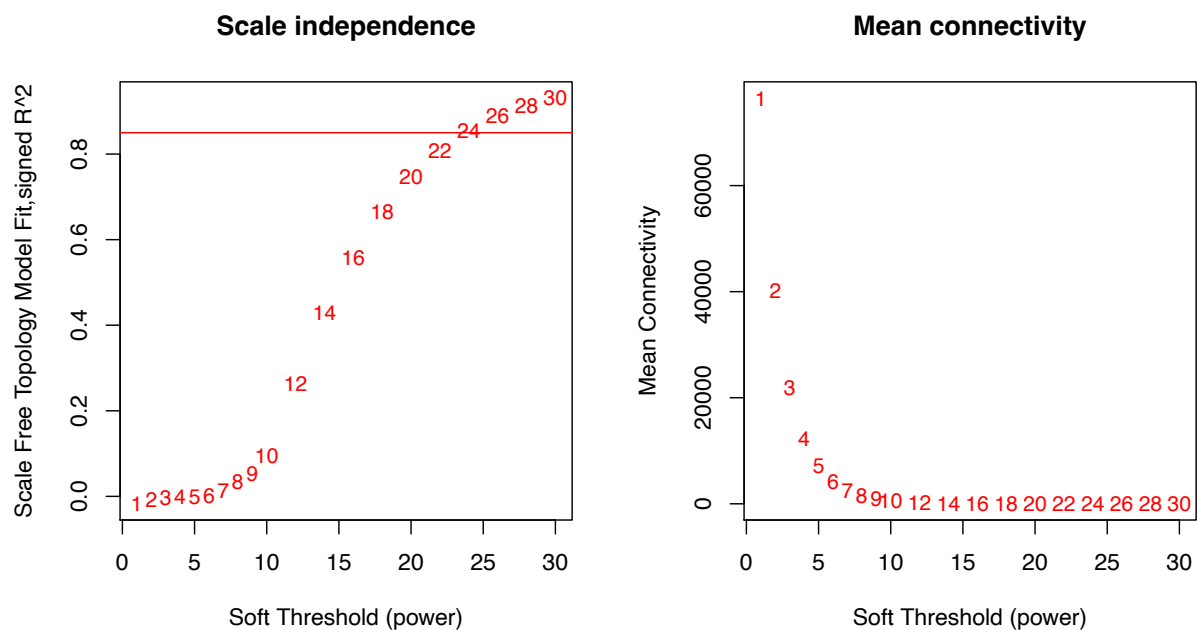

**Supplementary Fig. 2:** Analysis of scale-free topology used to determine the soft-thresholding power for infant hippocampal DNA methylation network construction.

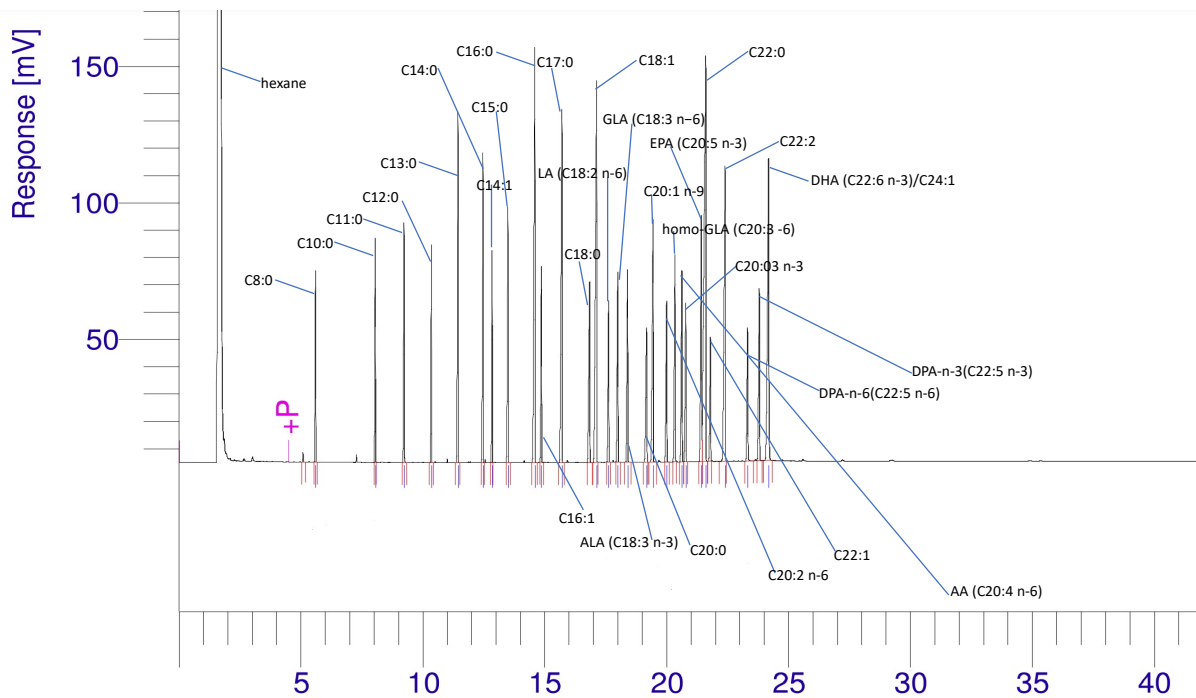

**Supplementary Fig. 3:** Chromatogram of 29 FAME standards used for lipidomic analyses.
