# Supplementary material for: Multi-omic brain and behavioral correlates of cell-free fetal DNA methylation in macaque maternal obesity models
Source: PubMed Central journal article supplement (PMC9492781; doi:10.1038/s41467-022-33162-7), 2022-09-21
Supplement: 41467_2022_33162_MOESM3_ESM.pdf [file 41467_2022_33162_MOESM3_ESM.pdf]

## **Description of Additional Supplementary Files**

**Supplementary Data 1:** Immunological and metabolomic measurements of maternal blood across pregnancy.

**Supplementary Data 2:** Infant lipidomic and metabolomic measurements.

**Supplementary Data 3:** Annotated regions from the infant hippocampus blue and yellow module maternal obesity networks.
